# Supplementary material for: Comprehensive Study of the Ammonium Sulfamate–Urea Binary System
Source: MDPI journal article supplement (doi:10.3390/molecules28020470), 2023-01-04
Supplement: s1 [file s1]

# Supplementary Materials

## Comprehensive Study of the Ammonium Sulfamate–Urea Binary System

Aleksandr S. Kazachenko <sup>1,2,3,\*</sup>, Nouredine Issaoui <sup>4</sup>, Olga Yu. Fetisova <sup>2</sup>, Yaroslava D. Berezhnaya <sup>2</sup>, Omar M. Al-DOSSARY <sup>5</sup>, Feride Akman <sup>6</sup>, Naveen Kumar <sup>7</sup>, Leda G. Bousiakou <sup>8</sup>, Anna S. Kazachenko <sup>1</sup>, Vladislav A. Ionin <sup>1,2</sup>, Evgeniy V. Elsufov <sup>1,2</sup> and Angelina V. Miroshnikova <sup>1,2</sup>

<sup>1</sup> Department of Organic and Analytical Chemistry, Siberian Federal University, pr. Svobodny 79, 660041 Krasnoyarsk, Russia

<sup>2</sup> Institute of Chemistry and Chemical Technology, Krasnoyarsk Scientific Center, Siberian Branch, Russian Academy of Sciences, Akademgorodok 50, Bld. 24, 660036 Krasnoyarsk, Russia

<sup>3</sup> Department of Biological Chemistry with Courses in Medical, Pharmaceutical and Toxicological Chemistry, Krasnoyarsk State Medical University, St. Partizan Zheleznyak, Bld. 1, 660022 Krasnoyarsk, Russia

<sup>4</sup> Laboratory of Quantum and Statistical Physics (LR18ES18), Faculty of Sciences, University of Monastir, Monastir 5079, Tunisia

<sup>5</sup> Department of Physics and Astronomy, College of Science, King Saud University, P.O. Box 2455, Riyadh 11451, Saudi Arabia

<sup>6</sup> Vocational School of Food, Agriculture and Livestock, University of Bingöl, Bingöl 12000, Turkey

<sup>7</sup> Department of Chemistry, Maharshi Dayanand University, Rohtak 124001, India

<sup>8</sup> IMD Laboratories Co., R&D Section, Lefkippos Technology Park, NCSR Demokritos, P.O. Box 60037, 15130 Athens, Greece

\* Correspondence: kazachenko.as@icct.krasn.ru or askazachenko@sfu-kras.ru

**Table S1.** AIM topological parameters for the ammonium sulfamate–urea system

| BCP          | $\rho$ (r) | $\nabla^2\rho$ (r) | V         | G         | K         | L         | E inter  | Ellipticity |
|--------------|------------|--------------------|-----------|-----------|-----------|-----------|----------|-------------|
| <b>N = 1</b> |            |                    |           |           |           |           |          |             |
| H5 ... H20   | +0.008945  | 3.99476e-18        | -0.006446 | +0.007398 | -0.000952 | -0.008350 | -8.3798  | +0.299088   |
| H12... N15   | +0.019059  | 1.60802e-17        | -0.013591 | +0.013513 | +0.000078 | -0.013435 | -17.6683 | +0.046143   |
| O4... H18    | +0.018597  | 3.89271e-17        | -0.015506 | +0.015403 | +0.000103 | -0.015300 | -20.1578 | +0.053690   |
| <b>N = 2</b> |            |                    |           |           |           |           |          |             |
| H18... O24   | +0.012353  | +0.044206          | -0.009381 | +0.010216 | -0.000835 | -0.011051 | -12.1953 | +0.154589   |
| O3... N6     | +0.011597  | +0.045085          | -0.008572 | +0.009922 | -0.001350 | -0.011271 | -11.1436 | +1.286594   |

|            |           |           |           |           |           |           |          |           |
|------------|-----------|-----------|-----------|-----------|-----------|-----------|----------|-----------|
| O4 ... H28 | +0.016922 | +0.056266 | -0.013992 | +0.014029 | -0.000037 | -0.014067 | -18.1896 | +0.105453 |
| O4... H26  | +0.019081 | +0.065762 | -0.016067 | +0.016253 | -0.000187 | -0.016440 | -20.8871 | +0.067441 |
| H20 ...O24 | +0.020503 | +0.066684 | -0.016913 | +0.016792 | +0.000121 | -0.016671 | -21.9869 | +0.029040 |
| O3... H17  | +0.023746 | +0.077578 | -0.02015  | +0.019772 | +0.000378 | -0.019394 | -26.195  | +0.025699 |
| O5 ... H7  | +0.045372 | +0.138790 | -0.038308 | +0.036503 | +0.001805 | -0.034697 | -49.8004 | +0.042730 |
| H10 ...O16 | +0.058894 | +0.179439 | -0.051324 | +0.048092 | +0.003232 | -0.044860 | -66.7212 | +0.024374 |
| N = 3      |           |           |           |           |           |           |          |           |
| O5 ... H7  | +0.043568 | +0.133744 | -0.036732 | +0.035084 | +0.001648 | -0.033436 | -47.7516 | +0.040146 |
| O3 ... H26 | +0.021569 | +0.068362 | -0.018222 | +0.017657 | +0.000566 | -0.017091 | -23.6886 | +0.055882 |
| O3... H17  | +0.021331 | +0.068850 | -0.018051 | +0.017632 | +0.000419 | -0.017212 | -23.4663 | +0.030460 |
| H20 ...O32 | +0.020041 | +0.066144 | -0.01656  | +0.016548 | +0.000012 | -0.016536 | -21.528  | +0.027807 |
| O4 ... H34 | +0.018483 | +0.063026 | -0.015536 | +0.015646 | -0.000110 | -0.015757 | -20.1968 | +0.042475 |
| O4 ... H28 | +0.015113 | +0.049144 | -0.012152 | +0.012219 | -0.000067 | -0.012286 | -15.7976 | +0.039806 |
| H11... N23 | +0.015596 | +0.045847 | -0.010775 | +0.011118 | -0.000343 | -0.011462 | -14.0075 | +0.092361 |
| H18... O32 | +0.013094 | +0.046474 | -0.010078 | +0.010848 | -0.000770 | -0.011619 | -13.1014 | +0.126377 |
| O4 ... H36 | +0.012306 | +0.042990 | -0.009754 | +0.010251 | -0.000497 | -0.010748 | -12.6802 | +0.126196 |
| O3... N6   | +0.009878 | +0.038456 | -0.007148 | +0.008381 | -0.001233 | -0.009614 | -9.2924  | +1.453816 |
| N = 4      |           |           |           |           |           |           |          |           |
| O3 ... H8  | +0.043805 | +0.135070 | -0.037038 | +0.035403 | +0.001635 | -0.033767 | -48.1494 | +0.044126 |
| O5... H7   | +0.016054 | +0.057459 | -0.012874 | +0.013619 | -0.000745 | -0.014365 | -16.7362 | +0.258061 |
| O3 ... H18 | +0.010971 | +0.039536 | -0.008662 | +0.009273 | -0.000611 | -0.009884 | -11.2606 | +0.108243 |
| N15... H28 | +0.024520 | +0.065089 | -0.017881 | +0.017077 | +0.000804 | -0.016272 | -23.2453 | +0.009599 |
| O4... H20  | +0.018347 | +0.059524 | -0.0153   | +0.015091 | +0.000210 | -0.014881 | -19.89   | +0.053887 |
| O5 ... H26 | +0.013941 | +0.048069 | -0.011433 | +0.011725 | -0.000292 | -0.012017 | -14.8629 | +0.061935 |
| H10... N23 | +0.045469 | +0.108990 | -0.034375 | +0.030811 | +0.003564 | -0.027247 | -44.6875 | +0.019004 |
| N23... N39 | +0.003571 | +0.010232 | -0.002101 | +0.002330 | -0.000228 | -0.002558 | -2.7313  | +0.891477 |
| O4... H34  | +0.011830 | +0.041644 | -0.00937  | +0.009890 | -0.000521 | -0.010411 | -12.181  | +0.088359 |
| H25 ...O32 | +0.009037 | +0.033363 | -0.006404 | +0.007372 | -0.000968 | -0.008341 | -8.3252  | +0.366027 |
| O5 ... H36 | +0.010541 | +0.037746 | -0.008069 | +0.008753 | -0.000684 | -0.009437 | -10.4897 | +0.148248 |
| O24... N37 | +0.004896 | +0.016307 | -0.002975 | +0.003526 | -0.000551 | -0.004077 | -3.8675  | +0.967446 |

|            |           |           |           |           |           |           |          |           |
|------------|-----------|-----------|-----------|-----------|-----------|-----------|----------|-----------|
| O32 ...H41 | +0.020743 | +0.065453 | -0.016975 | +0.016669 | +0.000306 | -0.016363 | -22.0675 | +0.068728 |
| O16 ...H43 | +0.014767 | +0.047366 | -0.011629 | +0.011735 | -0.000106 | -0.011841 | -15.1177 | +0.057771 |
| O24 ...N39 | +0.003930 | +0.013002 | -0.002325 | +0.002788 | -0.000463 | -0.003250 | -3.0225  | +0.667436 |
